# Supplementary material for: Comparative Genomics of Pseudomonas aeruginosa Strains Isolated from Different Ecological Niches
Source: MDPI journal article supplement (doi:10.3390/antibiotics12050866), 2023-05-07
Supplement: s1 [file s1]

**Table S1.** General features of the drafts of four *P. aeruginosa* strains isolated from the Mexican Hospital.

| Features of the genomes          | PE21      | PE52      | PE63      | PE83      |
|----------------------------------|-----------|-----------|-----------|-----------|
| Total contigs                    | 101       | 47        | 26        | 103       |
| G+C content (bp)                 | 65.47     | 66.14     | 66.57     | 65.51     |
| Genome size (bp)                 | 7,388,095 | 6,786,596 | 6,235,658 | 7,342,540 |
| Number of genes                  | 6,961     | 6,348     | 5,735     | 6,924     |
| Number of coding sequences (CDS) | 6,884     | 6,274     | 5,662     | 6,847     |

The number of genes and CDS was determined based on the Prokka annotations results.

**Table S2.** General features of *P. aeruginosa* genomes included in this study.

| STRAIN     | ACCESSION NUMBER                     | ST   | ISOLATION SOURCE   | COUNTRY       | GENOME SIZE (bp)           | RESISTANCE GENOTYPE                                                                                                                                                                                                                                                                                                                                                                     |
|------------|--------------------------------------|------|--------------------|---------------|----------------------------|-----------------------------------------------------------------------------------------------------------------------------------------------------------------------------------------------------------------------------------------------------------------------------------------------------------------------------------------------------------------------------------------|
| UCBPP-PA14 | CP000438.1                           | 253  | -                  | -             | 6,537,648                  | <i>crpP</i> , <i>fosA</i> , <i>catB7</i> , <i>bla</i> <sub>OXA-488</sub> , <i>bla</i> <sub>PAO</sub> , <i>aph</i> (3')-Ib                                                                                                                                                                                                                                                               |
| PAO1       | NC_002516.2                          | 549  | Burn wound isolate | -             | 6,264,404                  | <i>aph</i> (3')-Ib, <i>catB7</i> , <i>bla</i> <sub>OXA-50</sub> , <i>bla</i> <sub>PAO</sub> , <i>fosA</i>                                                                                                                                                                                                                                                                               |
| PE21       | JARDUV000000000                      | 167  | Sputum             | Mexico        | 7,398,559                  | <i>aph</i> (3')-Ib, <i>aac</i> (6')-II, <i>aadA1b</i> , <i>aph</i> (3')-Via, <i>aph</i> (3')-Ib, <i>aadA6</i> , <i>aac</i> (6')-33, <i>sul1</i> , <i>catB7</i> , <i>catA1</i> , <i>bla</i> <sub>GES-32</sub> , <i>bla</i> <sub>OXA-2</sub> , <i>bla</i> <sub>IMP-62</sub> , <i>bla</i> <sub>OXA-494</sub> , <i>bla</i> <sub>PAO</sub> , <i>fosA</i>                                     |
| PE52       | JARDUU000000000                      | 2731 | Urine              | Mexico        | 6,775,738                  | <i>aph</i> (3')-Ib, <i>aadA1b</i> , <i>fosA</i> , <i>sul1</i> , <i>catB7</i> , <i>bla</i> <sub>PAO</sub> , <i>bla</i> <sub>IMP-56</sub> , <i>bla</i> <sub>OXA-2</sub> , <i>bla</i> <sub>OXA-396</sub>                                                                                                                                                                                   |
| PE63       | JARDUW000000000                      | 549  | Urine              | Mexico        | 6,219,535                  | <i>aph</i> (3')-Ib, <i>catB7</i> , <i>bla</i> <sub>OXA-50</sub> , <i>bla</i> <sub>PAO</sub> , <i>fosA</i>                                                                                                                                                                                                                                                                               |
| PE83       | JARDUX000000000                      | 167  | Urine              | Mexico        | 7,358,407                  | <i>qnrVC1</i> , <i>aac</i> (6')-II, <i>aph</i> (3')-Via, <i>aadA1b</i> , <i>aadA6</i> , <i>aph</i> (3')-Ib, <i>fosA</i> , <i>sul1</i> , <i>dfrA15</i> , <i>catB7</i> , <i>catA1</i> , <i>bla</i> <sub>PAO</sub> , <i>bla</i> <sub>OXA-2</sub> , <i>bla</i> <sub>OXA-494</sub> , <i>bla</i> <sub>IMP-62</sub>                                                                            |
| 97         | NZ_CP031449.2                        | 234  | Urine              | Ghana: Kumasi | 6,925,889                  | <i>crpP</i> , <i>qnrVC1</i> , <i>aadA1</i> , <i>aac</i> (6')-Ib3, <i>aac</i> (6')-Ia, <i>aph</i> (3')-II, <i>aadA10</i> , <i>fosA</i> , <i>dfrB5</i> , <i>sul1</i> , <i>catB7</i> , <i>arr-2</i> , <i>bla</i> <sub>IMP-1</sub> , <i>bla</i> <sub>OXA-486</sub> , <i>bla</i> <sub>DIM-1</sub> , <i>bla</i> <sub>OXA-10</sub> , <i>bla</i> <sub>PAO</sub> , <i>bla</i> <sub>OXA-129</sub> |
| A-I-1      | NZ_CP060243.1                        | 111  | Urine              | France: Rouen | 7,087,087                  | <i>crpP</i> , <i>aph</i> (3')-Ib, <i>aac</i> (6')-Ib3, <i>aadA2b</i> , <i>fosA</i> , <i>sul1</i> , <i>catB7</i> , <i>bla</i> <sub>PAO</sub> , <i>cmlA2</i> , <i>bla</i> <sub>OXA-9</sub> , <i>bla</i> <sub>OXA-395</sub> , <i>bla</i> <sub>CARB-2</sub> , <i>aacA</i> (6')-Ib                                                                                                           |
| B-I-1      | NZ_CP060242.1                        | 235  | Urine              | France: Rouen | 6,935,851                  | <i>aadA11</i> , <i>aph</i> (3')-Ib, <i>aac</i> (6')-Ib3, <i>ant</i> (2')-Ia, <i>fosA</i> , <i>sul1</i> , <i>dfrB1</i> , <i>bla</i> <sub>OXA-488</sub> , <i>bla</i> <sub>PAO</sub> , <i>bla</i> <sub>OXA-35</sub>                                                                                                                                                                        |
| CCUG 51971 | NZ_CP043328.1                        | 235  | Urine              | Sweden: Solna | 7,012,798                  | <i>crpP</i> , <i>fosA</i> , <i>aph</i> (3')-Ib, <i>aac</i> (6')-Ib3, <i>sul1</i> , <i>catB7</i> , <i>arr-7</i> , <i>bla</i> <sub>PAO</sub> , <i>bla</i> <sub>OXA-35</sub> , <i>bla</i> <sub>VIM-4</sub> , <i>bla</i> <sub>OXA-488</sub>                                                                                                                                                 |
| C-I-1      | NZ_CP060241.1                        | 3227 | Urine              | France: Rouen | 6,325,392                  | <i>aph</i> (3')-II, <i>catB7</i> , <i>bla</i> <sub>PAO</sub> , <i>bla</i> <sub>OXA-50</sub> , <i>fosA</i>                                                                                                                                                                                                                                                                               |
| F5677      | NZ_CP026680.1                        | 111  | Urine              | USA: New York | 6,645,227                  | <i>crpP</i> , <i>aph</i> (3')-Ib, <i>aph</i> (3')-II, <i>aph</i> (6')-Id, <i>catB7</i> , <i>bla</i> <sub>OXA-395</sub> , <i>bla</i> <sub>PAO</sub> , <i>fosA</i>                                                                                                                                                                                                                        |
| G-I-1      | NZ_CP060240.1                        | 232  | Urine              | France: Rouen | 6,480,192                  | <i>crpP</i> , <i>aph</i> (3')-Ib, <i>catB7</i> , <i>bla</i> <sub>PAO</sub> , <i>bla</i> <sub>OXA-396</sub> , <i>fosA</i>                                                                                                                                                                                                                                                                |
| IMP-13     | C: NZ_CP034354.1<br>P: NZ_CP034355.1 | 621  | Urine              | Belgium       | C: 7,047,704<br>P: 130,306 | <i>crpP</i> , <i>fosA</i> , <i>aph</i> (3')-Ib, <i>aac</i> (6')-Ib4, <i>aph</i> (3')-VI, <i>sul1</i> , <i>catB7</i> , <i>bla</i> <sub>OXA-914</sub> , <i>bla</i> <sub>IMP-13</sub> , <i>bla</i> <sub>PAO</sub>                                                                                                                                                                          |

|             |                                       |         |                          |                       |                            |                                                                                                                                                                                                                                                                                                  |
|-------------|---------------------------------------|---------|--------------------------|-----------------------|----------------------------|--------------------------------------------------------------------------------------------------------------------------------------------------------------------------------------------------------------------------------------------------------------------------------------------------|
| NCGM257     | NZ_AP014651.1                         | 357     | Urine                    | Japan                 | 7,090,694                  | <i>crpP</i> , <i>aadA2</i> , <i>ant(2'')-Ia</i> , <i>aph(3')-IIB</i> , <i>fosA</i> , <i>sul1</i> , <i>tet(G)</i> , <i>catB7</i> , <i>blaIMP-1</i> , <i>blaOXA-4</i> , <i>blaOXA-846</i> , <i>blaPAO</i> , <i>flaR2</i>                                                                           |
| PA1088      | NZ_CP015001.1                         | 277     | Urine                    | Brazil: Sao Paulo, SP | 6,721,480                  | <i>crpP</i> , <i>fosA</i> , <i>aadA7</i> , <i>aph(3')-lib</i> , <i>aac(6')-lb</i> , <i>rmtD1</i> , <i>sul1</i> , <i>cmx</i> , <i>catB7</i> , <i>blaOXA-56</i> , <i>blaPAO</i> , <i>blaOXA-494</i> , <i>blaSPM-1</i>                                                                              |
| PB353       | C: NZ_CP025051.1<br>P: NZ_CP025052.1  | Unknown | Urine                    | USA: New York         | C: 6,437,515<br>P: 59,923  | <i>aph(3')-lib</i> , <i>catB7</i> , <i>blaPAO</i> , <i>blaOXA-50</i> , <i>fosA</i> , <i>aac(6')-lb</i> , <i>aac(6')-lb4</i> , <i>sul1</i> , <i>blaTEM-1B</i> , <i>blaOXA-101</i> , <i>blaCTX-M-30</i>                                                                                            |
| PSE6684     | NZ_CP053917.1                         | 773     | Urine                    | South Korea           | 6,924,367                  | <i>qnrVC1</i> , <i>aac(6')-lb</i> , <i>fosA</i> , <i>tet(G)</i> , <i>aadA</i> , <i>sul1</i> , <i>aph(3')-lib</i> , <i>rmtB4</i> , <i>catB7</i> , <i>arr-2</i> , <i>blaNDM-1</i> , <i>blaPAO</i> , <i>blaOXA-796</i> , <i>blaOXA-395</i>                                                          |
| ST773       | NZ_CP041945.1                         | 773     | Urine                    | USA: Houston          | 6,835,731                  | <i>qnrVC1</i> , <i>rmtB4</i> , <i>aph(3')-lib</i> , <i>aadA</i> , <i>fosA</i> , <i>sul1</i> , <i>tet(G)</i> , <i>catB7</i> , <i>blaNDM-1</i> , <i>blaOXA-395</i> , <i>blaPAO</i>                                                                                                                 |
| PA790       | CP075176.1                            | 773     | Urine                    | India: Lucknow        | 6,932,250                  | <i>qnrVC1</i> , <i>rmtB</i> , <i>aph(3')-lib</i> , <i>fosA</i> , <i>sul1</i> , <i>tet(G)</i> , <i>catB7</i> , <i>aadA</i> , <i>blaOXA-395</i> , <i>blaNDM-1</i> , <i>blaPAO</i>                                                                                                                  |
| ZBX-P12     | CP061779.1                            | 233     | Urine                    | Lebanon:Beirut        | 7,080,089                  | <i>crpP</i> , <i>aac(6')-lb</i> , <i>fosA</i> , <i>aac(6')-IIC</i> , <i>aph(3')-lib</i> , <i>aadA2</i> , <i>sul1</i> , <i>cmlA1</i> , <i>catB7</i> , <i>blaOXA-4</i> , <i>blaIMP-15</i> , <i>blaOXA-486</i> , <i>blaPAO</i>                                                                      |
| PAM68       | CP065948.1                            | 1639    | Urine                    | China: Shaanxi        | 6,560,248                  | <i>crpP</i> , <i>aph(3')-lib</i> , <i>catB7</i> , <i>blaOXA-486</i> , <i>blaPAO</i> , <i>fosA</i>                                                                                                                                                                                                |
| PAS6        | CP065947.1                            | 1639    | Urine                    | China: Shaanxi        | 6,742,928                  | <i>crpP</i> , <i>aph(3')-lib</i> , <i>catB7</i> , <i>blaOXA-50</i> , <i>blaPAO</i> , <i>fosA</i>                                                                                                                                                                                                 |
| PAG7        | CP065374.1                            | 1639    | Urine                    | China: Shaanxi        | 6,715,242                  | <i>crpP</i> , <i>fosA</i> , <i>catB7</i> , <i>blaOXA-50</i> , <i>blaPAO</i> , <i>aph(3')-lib</i>                                                                                                                                                                                                 |
| SE5429      | CP054845.1                            | 235     | Urine                    | China: Jiangsu        | 7,103,853                  | <i>crpP</i> , <i>fosA</i> , <i>aadA1</i> , <i>aac(3)-IId</i> , <i>aph(3')-VI</i> , <i>aph(3')-lib</i> , <i>sul1</i> , <i>cml</i> , <i>catB7</i> , <i>blaPAO</i> , <i>blaVEB-3</i> , <i>blaOXA-488</i> , <i>blaOXA-10</i>                                                                         |
| 1811-13R031 | NZ_CP046061.1                         | 395     | Sputum (lung infection)  | China                 | 7,344,079                  | <i>crpP</i> , <i>aph(3')-lib</i> , <i>catB7</i> , <i>blaOXA-905</i> , <i>blaPAO</i> , <i>fosA</i>                                                                                                                                                                                                |
| 1811-18R001 | NZ_CP046060.1                         | 395     | Sputum (lung infection)  | China                 | 7,343,000                  | <i>crpP</i> , <i>fosA</i> , <i>catB7</i> , <i>blaPAO</i> , <i>blaOXA-905</i> , <i>aph(3')-lib</i>                                                                                                                                                                                                |
| 60503       | C: NZ_CP041774.1<br>P: NZ_MN208063.1  | 773     | Sputum (pneumonia)       | China: Beijing        | C: 6,809,062<br>P: 407,628 | <i>crpP</i> , <i>aph(3')-lib</i> , <i>blaOXA-395</i> , <i>blaPAO</i> , <i>fosA</i> , <i>aph(6)-id</i> , <i>aadA1</i> , <i>qnrVC6</i> , <i>sul1</i> , <i>dfrA1</i> , <i>dfrB2c</i> , <i>blaOXA-4</i> , <i>blaDIM-1</i> , <i>catB3</i> , <i>aph(3')-lb</i> , <i>aac(6')-lb</i>                     |
| 1903031130  | CP060392.1                            | 235     | Sputum (pneumonia)       | China: Henan          | 6,905,506                  | <i>fosA</i> , <i>aph(3')-lib</i> , <i>aph(3')-XV</i> , <i>sul1</i> , <i>aadA6</i> , <i>tet(G)</i> , <i>catB7</i> , <i>blaGES-15</i> , <i>blaPAO</i> , <i>blaOXA-488</i> , <i>aac(6')-lb4</i>                                                                                                     |
| AG1         | NZ_CP045739.1                         | 111     | Sputum-lungs (Pneumonia) | Costa Rica            | 7,190,208                  | <i>crpP</i> , <i>fosA</i> , <i>aph(3')-lib</i> , <i>aac(6')-29a</i> , <i>aac(6')-29b</i> , <i>sul1</i> , <i>catB7</i> , <i>blaOXA-2</i> , <i>blaIMP-18</i> , <i>blaPAO</i> , <i>blaVIM-2</i> , <i>blaOXA-395</i>                                                                                 |
| LW          | NZ_CP022478.1                         | 1182    | Sputum (infection)       | China: Beijing        | 6,824,837                  | <i>crpP</i> , <i>aph(3')-lib</i> , <i>catB7</i> , <i>blaOXA-851</i> , <i>blaPAO</i> , <i>fosA</i>                                                                                                                                                                                                |
| PA19-3047   | CP068239.1                            | 235     | Sputum (bronchiectasis)  | China                 | 6,857,397                  | <i>crpP</i> , <i>ant(2'')-Ia</i> , <i>aac(6')-lb</i> , <i>aadA6</i> , <i>aph(3')-lib</i> , <i>fosA</i> , <i>sul1</i> , <i>dfrA5</i> , <i>cmx</i> , <i>catB3</i> , <i>catB7</i> , <i>blaPER-4</i> , <i>blaPAO</i> , <i>blaOXA-488</i> , <i>blaOXA-17</i> , <i>blaOXA-129</i> , <i>aac(6')-lb'</i> |
| PASGNDM345  | NZ_CP020703.1                         | 308     | Sputum                   | Singapore             | 6,893,164                  | <i>aadA</i> , <i>aph(3')-lb</i> , <i>aph(3')-lib</i> , <i>aac(6')-II</i> , <i>aph(6)-Id</i> , <i>aac(3)-Id</i> , <i>fosA</i> , <i>msr(E)</i> , <i>sul2</i> , <i>dfrB5</i> , <i>floR</i> , <i>catB7</i> , <i>blaOXA-488</i> , <i>blaPAO</i> , <i>blaNDM-1</i> , <i>qnrVC1</i> , <i>crpP</i>       |
| PASGNDM699  | NZ_CP020704.1                         | 308     | Sputum                   | Singapore             | 6,985,102                  | <i>qnrVC1</i> , <i>crpP</i> , <i>fosA</i> , <i>aadA</i> , <i>aac(3)-Id</i> , <i>aph(3')-lib</i> , <i>aph(3')-lb</i> , <i>aph(6)-Id</i> , <i>aac(6')-II</i> , <i>msr(E)</i> , <i>dfrB5</i> , <i>sul2</i> , <i>floR</i> , <i>catB7</i> , <i>blaPAO</i> , <i>blaNDM-1</i> , <i>blaOXA-488</i>       |
| PB350       | NZ_CP025055.2                         | 235     | Sputum                   | USA: New York         | 6,752,906                  | <i>sul1</i> , <i>dfrA10</i> , <i>fosA</i> , <i>catB7</i> , <i>blaPAO</i> , <i>blaOXA-488</i> , <i>ant(2'')-Ia</i> , <i>aph(3')-lib</i>                                                                                                                                                           |
| R31         | C: NZ_CP061850.1;<br>P: NZ_CP061851.1 | Unknown | Sputum                   | China: chongqing      | C: 6,893,878<br>P: 29,402  | <i>crpP</i> , <i>aph(3')-lib</i> , <i>catB7</i> , <i>blaPAO</i> , <i>blaOXA-486</i> , <i>fosA</i> , <i>blaKPC-2</i>                                                                                                                                                                              |
| SE5352      | CP054843.1                            | 235     | Sputum                   | China: Jiangsu        | 6,904,218                  | <i>fosA</i> , <i>aadA6</i> , <i>sul1</i> , <i>aac(6')-lb4</i> , <i>aph(3')-XV</i> , <i>aph(3')-lib</i> , <i>tet(G)</i> , <i>catB7</i> , <i>blaPAO</i> , <i>blaGES-1</i> , <i>blaOXA-488</i>                                                                                                      |
| SE5357      | CP054844.1                            | 244     | Sputum                   | China: Jiangsu        | 7,043,467                  | <i>crpP</i> , <i>aph(3')-lb</i> , <i>aph(3')-lib</i> , <i>aac(6')-lb</i> , <i>aadA5</i> , <i>fosA</i> , <i>sul1</i> , <i>catB7</i> , <i>blaPER-1</i> , <i>blaOXA-101</i> , <i>blaOXA-847</i> , <i>blaPAO</i> , <i>aph(6)-Id</i>                                                                  |

|             |                                       |         |                                                    |                           |                            |                                                                                                                                                                                                                                                                                                                                                                                                                                     |
|-------------|---------------------------------------|---------|----------------------------------------------------|---------------------------|----------------------------|-------------------------------------------------------------------------------------------------------------------------------------------------------------------------------------------------------------------------------------------------------------------------------------------------------------------------------------------------------------------------------------------------------------------------------------|
| SE5416      | C: NZ_CP046404.1<br>P: NZ_MN894887.1  | 697     | Sputum (Infection caused by fracture)              | China: Suzhou             | C: 6,874,270<br>P: 510,711 | <i>crpP</i> , <i>aph(3')-Ib</i> , <i>aadA1</i> , <i>fosA</i> , <i>sul1</i> , <i>tet(G)</i> , <i>catB7</i> , <i>cmiA1</i> , <i>bla<sub>OXA-494</sub></i> , <i>bla<sub>PAO</sub></i> , <i>mph(A)</i> , <i>qnrS2</i> , <i>tet(G)</i> , <i>bla<sub>TEM-1</sub></i> , <i>bla<sub>KPC-2</sub></i> , <i>qacE</i> , <i>aac(3)-III</i>                                                                                                       |
| SP4371      | NZ_CP034369.1                         | 357     | Sputum (Bacteraemia)                               | India                     | 6,937,609                  | <i>msr(E)</i> , <i>aph(3')-VI</i> , <i>aadA1</i> , <i>ant(2'')-Ia</i> , <i>aac(6')-II</i> , <i>aph(3')-lib</i> , <i>fosA</i> , <i>sul1</i> , <i>dfxB2</i> , <i>tet(A)</i> , <i>catB7</i> , <i>bla<sub>OXA-10</sub></i> , <i>bla<sub>NDM-1</sub></i> , <i>bla<sub>VEB-1</sub></i> , <i>bla<sub>PAO</sub></i> , <i>bla<sub>PME-1</sub></i> , <i>bla<sub>OXA-846</sub></i> , <i>crpP</i>                                               |
| SP4527      | NZ_CP034409.1                         | 357     | Sputum (Bacteraemia)                               | India                     | 7,005,215                  | <i>msr(E)</i> , <i>fosA</i> , <i>aac(6')-II</i> , <i>aadA1</i> , <i>aph(3')-VI</i> , <i>ant(2'')-Ia</i> , <i>aph(3')-lib</i> , <i>sul1</i> , <i>dfxB2</i> , <i>tet(A)</i> , <i>catB7</i> , <i>cmiA1</i> , <i>arr-3</i> , <i>bla<sub>PAO</sub></i> , <i>bla<sub>OXA-846</sub></i> , <i>bla<sub>OXA-10</sub></i> , <i>bla<sub>NDM-1</sub></i> , <i>bla<sub>PME-1</sub></i> , <i>bla<sub>VEB-1</sub></i> , <i>msr(E)</i> , <i>crpP</i> |
| SP4528      | NZ_CP033439.1                         | 357     | Sputum (Respiratory tract infection)               | India                     | 6,877,287                  | <i>crpP</i> , <i>fosA</i> , <i>sul1</i> , <i>dfxB2</i> , <i>aac(6')-II</i> , <i>ant(2'')-Ia</i> , <i>aadA1</i> , <i>aph(3')-lib</i> , <i>msr(E)</i> , <i>tet(A)</i> , <i>catB7</i> , <i>bla<sub>NDM-1</sub></i> , <i>bla<sub>PAO</sub></i> , <i>bla<sub>OXA-846</sub></i> , <i>bla<sub>OXA-10</sub></i> , <i>bla<sub>VEB-1</sub></i> , <i>bla<sub>PME-1</sub></i>                                                                   |
| Y31         | NZ_CP030910.1                         | Unknown | Sputum (Pneumonia)                                 | South Korea: Seoul        | 6,831,076                  | <i>crpP</i> , <i>fosA</i> , <i>catB7</i> , <i>bla<sub>PAO</sub></i> , <i>bla<sub>OXA-486</sub></i> , <i>aph(6)-Id</i> , <i>aph(3')-lib</i> , <i>aac(2'')-Ia</i> , <i>aph(3')-Ib</i>                                                                                                                                                                                                                                                 |
| Y71         | NZ_CP030911.1                         | 245     | Sputum (Pneumonia)                                 | South Korea: Seoul        | 6,940,949                  | <i>crpP</i> , <i>ant(2'')-Ia</i> , <i>aph(3')-lib</i> , <i>aph(3')-VI</i> , <i>aac(6')-31</i> , <i>fosA</i> , <i>sul1</i> , <i>catB7</i> , <i>cmx</i> , <i>bla<sub>PAO</sub></i> , <i>bla<sub>OXA-494</sub></i> , <i>bla<sub>OXA-1</sub></i>                                                                                                                                                                                        |
| Y82         | NZ_CP030912.1                         | 111     | Sputum (Pneumonia)                                 | South Korea: Seoul        | 7,106,857                  | <i>crpP</i> , <i>ant(2'')-Ia</i> , <i>aph(3')-lib</i> , <i>aac(6')-31</i> , <i>fosA</i> , <i>sul1</i> , <i>catB7</i> , <i>bla<sub>PAO</sub></i> , <i>bla<sub>OXA-395</sub></i> , <i>bla<sub>OXA-1</sub></i>                                                                                                                                                                                                                         |
| ACR22       | NZ_CP058331.1                         | Unknown | Sugarcane                                          | China: Nanning            | 6,490,021                  | <i>fosA</i> , <i>catB7</i> , <i>bla<sub>PAO</sub></i> , <i>bla<sub>OXA-486</sub></i> , <i>aph(3')-lib</i>                                                                                                                                                                                                                                                                                                                           |
| AJ D 2      | NZ_CP038661.1                         | 234     | Rhizosphere                                        | India                     | 6,281,520                  | <i>fosA</i> , <i>catB7</i> , <i>bla<sub>PAO</sub></i> , <i>bla<sub>OXA-486</sub></i> , <i>aph(3')-lib</i>                                                                                                                                                                                                                                                                                                                           |
| B10W        | NZ_CP017969.1                         | 308     | wastewater                                         | USA: Honolulu             | 6,723,378                  | <i>crpP</i> , <i>aph(3')-lib</i> , <i>catB7</i> , <i>bla<sub>PAO</sub></i> , <i>bla<sub>OXA-486</sub></i> , <i>fosA</i>                                                                                                                                                                                                                                                                                                             |
| CFSAN084950 | NZ_CP045768.1                         | Unknown | Arugula                                            | USA:GA                    | 6,441,924                  | <i>fosA</i> , <i>catB7</i> , <i>bla<sub>PAO</sub></i> , <i>bla<sub>OXA-494</sub></i> , <i>aph(3')-lib</i>                                                                                                                                                                                                                                                                                                                           |
| DN1         | C: NZ_CP017099.1;<br>P: NZ_CP018048.1 | 316     | Soil                                               | China                     | C: 6,641,902<br>P: 317,349 | <i>crpP</i> , <i>aph(3')-lib</i> , <i>catB7</i> , <i>bla<sub>PAO</sub></i> , <i>bla<sub>OXA-395</sub></i> , <i>fosA</i>                                                                                                                                                                                                                                                                                                             |
| FA-HZ1      | NZ_CP017353.1                         | 27      | wastewater                                         | China                     | 6,866,790                  | <i>crpP</i> , <i>fosA</i> , <i>catB7</i> , <i>bla<sub>PAO</sub></i> , <i>bla<sub>OXA-494</sub></i> , <i>aph(3')-lib</i>                                                                                                                                                                                                                                                                                                             |
| HS9         | NZ_CP030861.1                         | 27      | Soil                                               | China: Shanghai           | 6,876,988                  | <i>crpP</i> , <i>fosA</i> , <i>catB7</i> , <i>bla<sub>OXA-494</sub></i> , <i>bla<sub>PAO</sub></i> , <i>aph(3')-lib</i>                                                                                                                                                                                                                                                                                                             |
| JB2         | NZ_CP028917.1                         | 296     | Soil                                               | USA: Madison, WI          | 6,867,314                  | <i>crpP</i> , <i>fosA</i> , <i>catB7</i> , <i>bla<sub>OXA-486</sub></i> , <i>bla<sub>PAO</sub></i> , <i>aph(3')-lib</i>                                                                                                                                                                                                                                                                                                             |
| JT86        | NZ_CP062219.1                         | 970     | Soil                                               | China: Guangzhou          | 6,520,277                  | <i>fosA</i> , <i>catB7</i> , <i>bla<sub>OXA-50</sub></i> , <i>bla<sub>PAO</sub></i> , <i>aph(3')-lib</i>                                                                                                                                                                                                                                                                                                                            |
| KRP1        | NZ_CP046069.1                         | 27      | Methanogenic sludge from a potato processing plant | Belgium: Primeur, Waregem | 6,737,396                  | <i>crpP</i> , <i>fosA</i> , <i>catB7</i> , <i>bla<sub>OXA-494</sub></i> , <i>bla<sub>PAO</sub></i> , <i>aph(3')-lib</i>                                                                                                                                                                                                                                                                                                             |
| L10         | NZ_CP019338.1                         | 253     | halobiotic reed                                    | China: Binzhou            | 6,661,962                  | <i>fosA</i> , <i>catB7</i> , <i>bla<sub>OXA-486</sub></i> , <i>bla<sub>PAO</sub></i> , <i>aph(3')-lib</i>                                                                                                                                                                                                                                                                                                                           |
| M8A1        | NZ_CP015647.1                         | 1054    | crude oil wastewater                               | Colombia: Arauca          | 6,368,297                  | <i>fosA</i> , <i>catB7</i> , <i>bla<sub>OXA-396</sub></i> , <i>bla<sub>PAO</sub></i> , <i>aph(3')-lib</i>                                                                                                                                                                                                                                                                                                                           |
| N17-1       | NZ_CP014948.1                         | 2362    | Soil                                               | China: Haidian, Beijing   | 6,370,730                  | <i>crpP</i> , <i>fosA</i> , <i>catB7</i> , <i>bla<sub>OXA-494</sub></i> , <i>bla<sub>PAO</sub></i> , <i>aph(3')-lib</i>                                                                                                                                                                                                                                                                                                             |
| Ocean-1155  | NZ_CP022526.1                         | 316     | Open sea                                           | Pacific Ocean             | 6,952,237                  | <i>crpP</i> , <i>fosA</i> , <i>catB7</i> , <i>bla<sub>OXA-395</sub></i> , <i>bla<sub>PAO</sub></i> , <i>aph(3')-lib</i>                                                                                                                                                                                                                                                                                                             |
| Ocean-1175  | NZ_CP022525.1                         | 316     | Open sea                                           | Pacific Ocean             | 6,943,220                  | <i>crpP</i> , <i>fosA</i> , <i>catB7</i> , <i>bla<sub>OXA-395</sub></i> , <i>bla<sub>PAO</sub></i> , <i>aph(3')-lib</i>                                                                                                                                                                                                                                                                                                             |
| PPF-1       | NZ_CP023316.1                         | Unknown | Dental Unit Water Line                             | Canada: Montreal          | 6,930,893                  | <i>crpP</i> , <i>fosA</i> , <i>catB7</i> , <i>bla<sub>OXA-908</sub></i> , <i>bla<sub>PAO</sub></i> , <i>aph(3')-lib</i>                                                                                                                                                                                                                                                                                                             |
| RD1-3       | NZ_CP047697.1                         | 257     | landfill                                           | China: Yangling           | 6,397,159                  | <i>fosA</i> , <i>catB7</i> , <i>bla<sub>OXA-1026</sub></i> , <i>bla<sub>PAO</sub></i> , <i>aph(3')-lib</i>                                                                                                                                                                                                                                                                                                                          |
| SJTD-1      | NZ_CP015877.1                         | 2619    | Soil                                               | China: Shanghai           | 6,243,825                  | <i>fosA</i> , <i>catB7</i> , <i>bla<sub>OXA-486</sub></i> , <i>bla<sub>PAO</sub></i> , <i>aph(3')-lib</i>                                                                                                                                                                                                                                                                                                                           |
| TJ2019-017  | NZ_CP065866.1                         | 241     | Water                                              | China: Tianjin            | 6,478,778                  | <i>crpP</i> , <i>fosA</i> , <i>catB7</i> , <i>bla<sub>OXA-1127</sub></i> , <i>bla<sub>PAO</sub></i> , <i>aph(3')-lib</i>                                                                                                                                                                                                                                                                                                            |
| YL84        | NZ_CP007147.1                         | 169     | compost                                            | Malaysia                  | 6,433,441                  | <i>crpP</i> , <i>fosA</i> , <i>catB7</i> , <i>bla<sub>OXA-396</sub></i> , <i>bla<sub>PAO</sub></i> , <i>aph(3')-lib</i>                                                                                                                                                                                                                                                                                                             |

The letter "C" means Chromosome and "P" means Plasmid

**Table S3.** Strains with ST167 reported in the MLST database.

| STRAIN     | ACCESS          | ST  | COUNTRY | ISOLATION SOURCE            | RESISTANCE GENOTYPE                                                                                                                                                                                                                                                                                                                                             |
|------------|-----------------|-----|---------|-----------------------------|-----------------------------------------------------------------------------------------------------------------------------------------------------------------------------------------------------------------------------------------------------------------------------------------------------------------------------------------------------------------|
| C40        | GCF_000480475.1 | 167 | USA     | Environmental               | <i>crpP</i> , <i>fosA</i> , <i>catB7</i> , <i>bla</i> <sub>PAO</sub> ,<br><i>aph(3')-Ib</i> , <i>bla</i> <sub>OXA-494</sub>                                                                                                                                                                                                                                     |
| AZPAE13872 | GCF_000795625.1 | 167 | Mexico  | Unknown                     | <i>fosA</i> , <i>aadA1b</i> , <i>aph(3')-Via</i> ,<br><i>aac(6')-II</i> , <i>aph(3')-Ib</i> , <i>sul1</i> ,<br><i>catB7</i> , <i>bla</i> <sub>PAO</sub> , <i>bla</i> <sub>OXA-494</sub> , <i>bla</i> <sub>IMP-15</sub>                                                                                                                                          |
| AZPAE14687 | GCF_000794515.1 | 167 | Mexico  | Respiratory tract infection | <i>aac(6')-II</i> , <i>fosA</i> , <i>aadA6</i> , <i>aph(3')-Ib</i> , <i>aadA1b</i> , <i>sul1</i> , <i>catA1</i> , <i>catB7</i> ,<br><i>bla</i> <sub>PAO</sub> , <i>bla</i> <sub>OXA-494</sub> , <i>bla</i> <sub>IMP-62</sub> ,<br><i>bla</i> <sub>OXA-2</sub>                                                                                                   |
| PAE0095    | GCA_021693455.1 | 167 | Unknown | -                           | <i>crpP</i> , <i>fosA</i> , <i>catB7</i> , <i>bla</i> <sub>PAO</sub> ,<br><i>aph(3')-Ib</i> , <i>bla</i> <sub>OXA-494</sub>                                                                                                                                                                                                                                     |
| PE21       | JARDUV000000000 | 167 | Mexico  | Sputum                      | <i>aph(3')-Ib</i> , <i>aac(6')-II</i> , <i>aadA1b</i> ,<br><i>aph(3')-Via</i> , <i>aph(3')-Ib</i> , <i>aadA6</i> ,<br><i>aac(6')-33</i> , <i>sul1</i> , <i>catB7</i> , <i>catA1</i> ,<br><i>bla</i> <sub>GES-32</sub> , <i>bla</i> <sub>OXA-2</sub> , <i>bla</i> <sub>IMP-62</sub> ,<br><i>bla</i> <sub>OXA-494</sub> , <i>bla</i> <sub>PAO</sub> , <i>fosA</i> |
| PE83       | JARDUX000000000 | 167 | Mexico  | urine                       | <i>qnrVC1</i> , <i>aac(6')-II</i> , <i>aph(3')-Via</i> ,<br><i>aadA1b</i> , <i>aadA6</i> , <i>aph(3')-Ib</i> ,<br><i>fosA</i> , <i>sul1</i> , <i>dfrA15</i> , <i>catB7</i> ,<br><i>catA1</i> , <i>bla</i> <sub>PAO</sub> , <i>bla</i> <sub>OXA-2</sub> , <i>bla</i> <sub>OXA-494</sub> , <i>bla</i> <sub>IMP-62</sub>                                           |

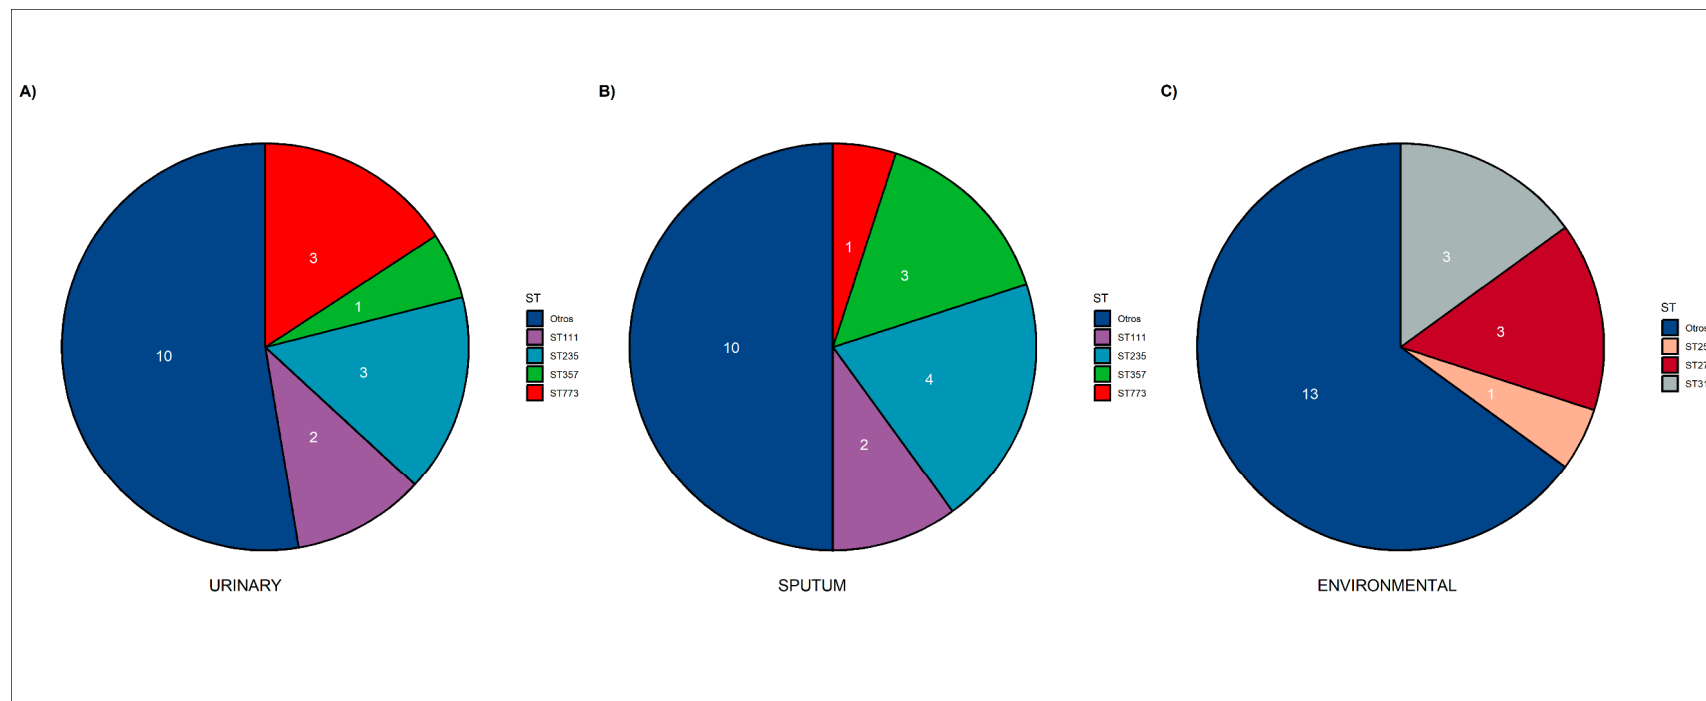

**Figure S1.** ST of the genomes of urinary (A), sputum (B), and environmental (C) strains. High-risk STs were detected in all three groups: being more predominant in sputum strains (75%).

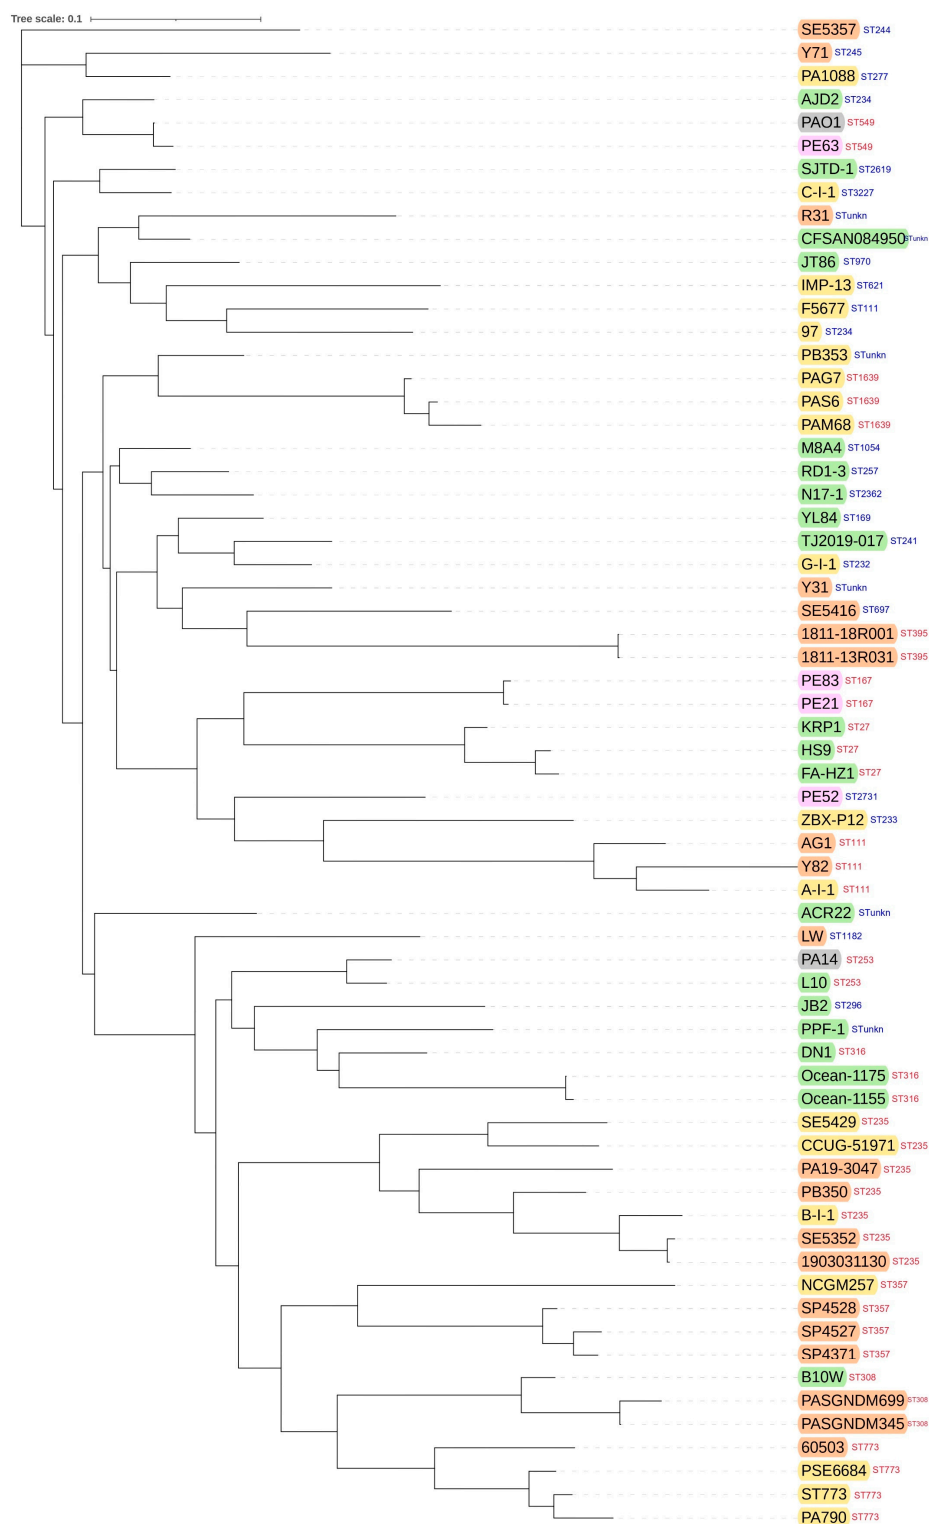

**Figure S2.** Phylogenetic tree based on presence and absence of accessory genome from the 65 strains. Strain names were colored according to isolation source. Yellow: urinary strains; Orange: sputum strains; Green: environmental strains; Pink: Mexican strains; Gray: Reference strains.

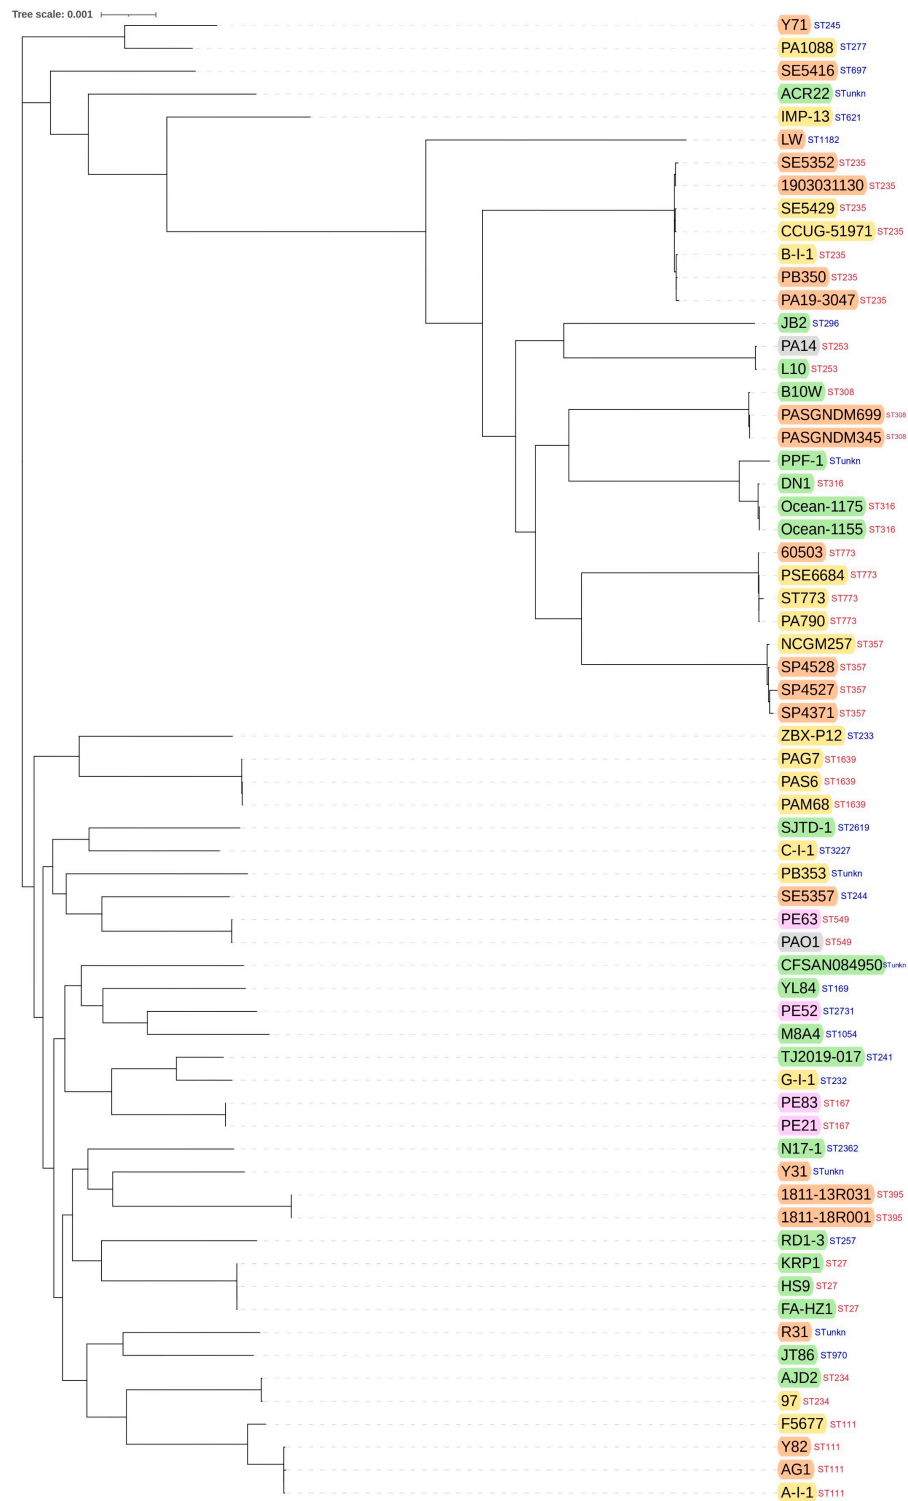

**Figure S3.** Dendrogram generated from the core genome. Strain names were colored according to the isolation source. Yellow: urinary strains; Orange: sputum strains; Green: environmental strains; Pink: Mexican strains; Gray: Reference strains.

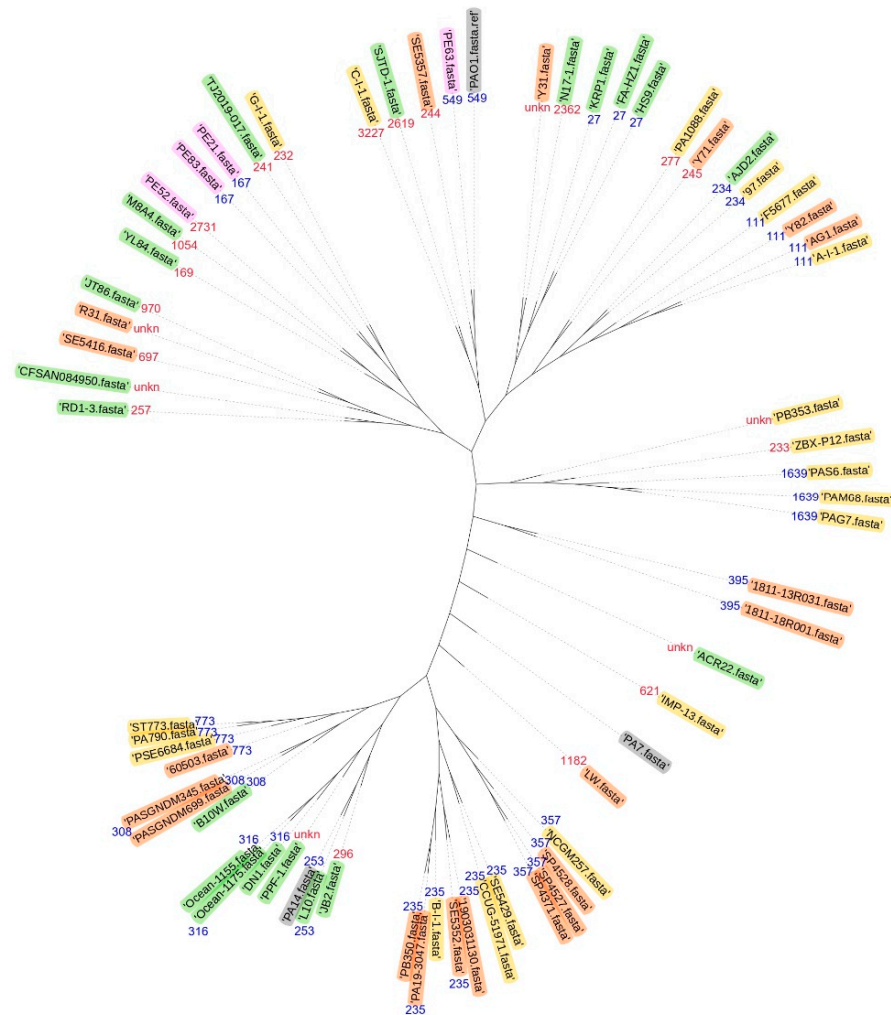

**Figure S4.** Phylogenetic tree generated based on SNPs. Strain names were colored according to the isolation source. Yellow: urinary strains; Orange: sputum strains; Green: environmental strains; Pink: Mexican strains; Gray: Reference strains. Numbers in colors red and blue are the STs.



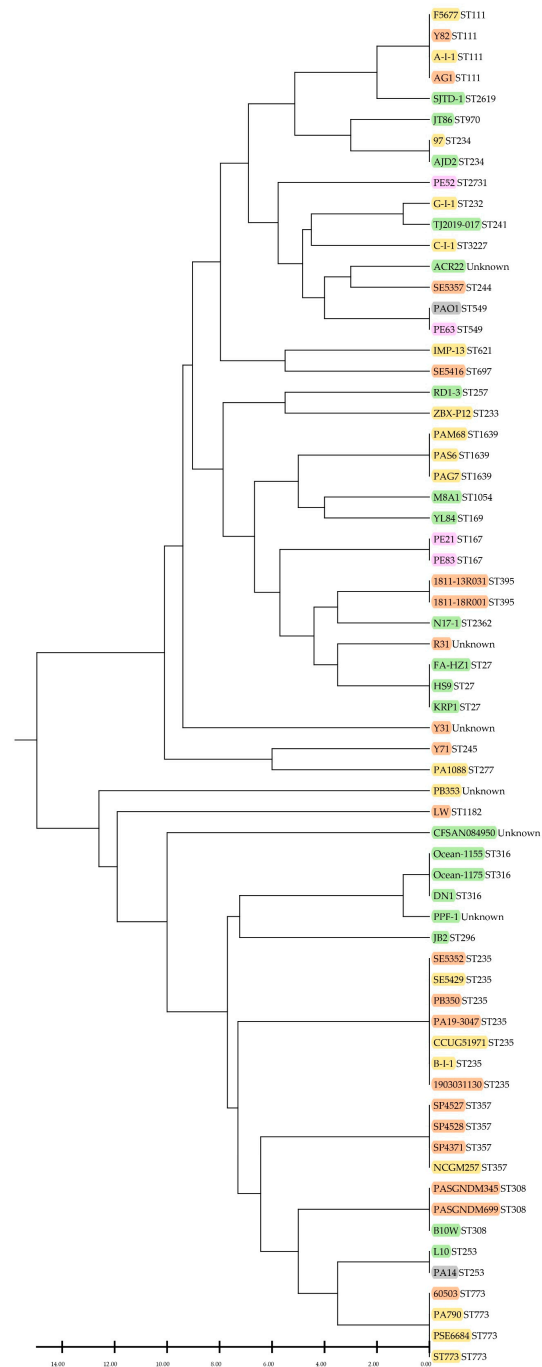

**Figure S5.** Phylogenetic tree based on concatenated sequences of MLST. The dendrogram was constructed with MEGA 11 using the UPGMA algorithm. Linkage distances are indicated on the scale at the bottom. Strain names were colored according to isolation source. Yellow: urinary strains; Orange: sputum strains; Green: environmental strains; Pink: Mexican strains; Gray: Reference strains.

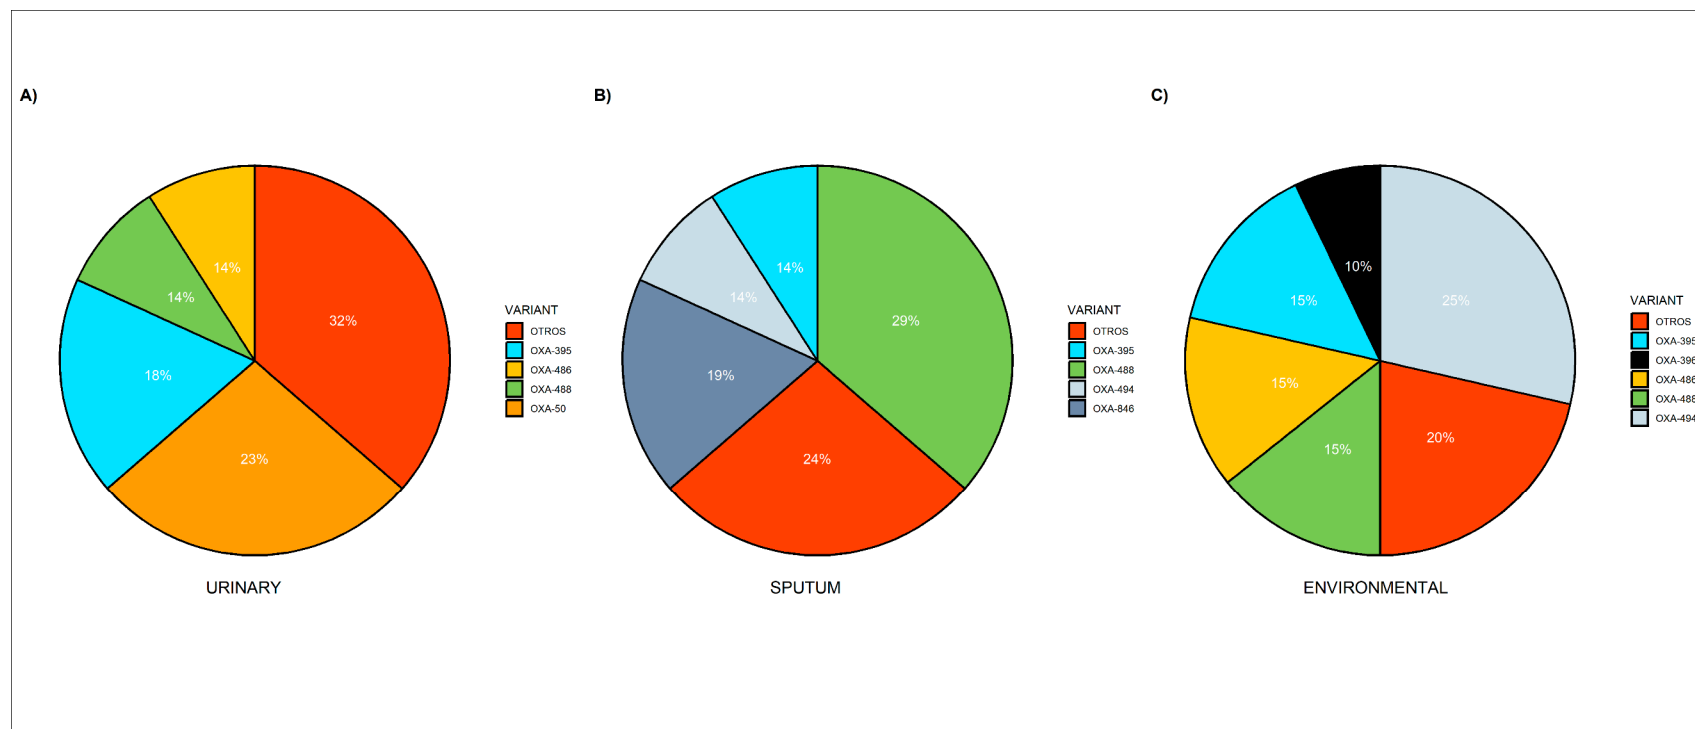

**Figure S6.** *bla*<sub>OXA-50</sub> family variants of strain genomes of A) Urinary, B) Sputum, and C) Environmental. The Beta-lactamase database was used to determine all variants of *bla*<sub>OXA-50</sub>.

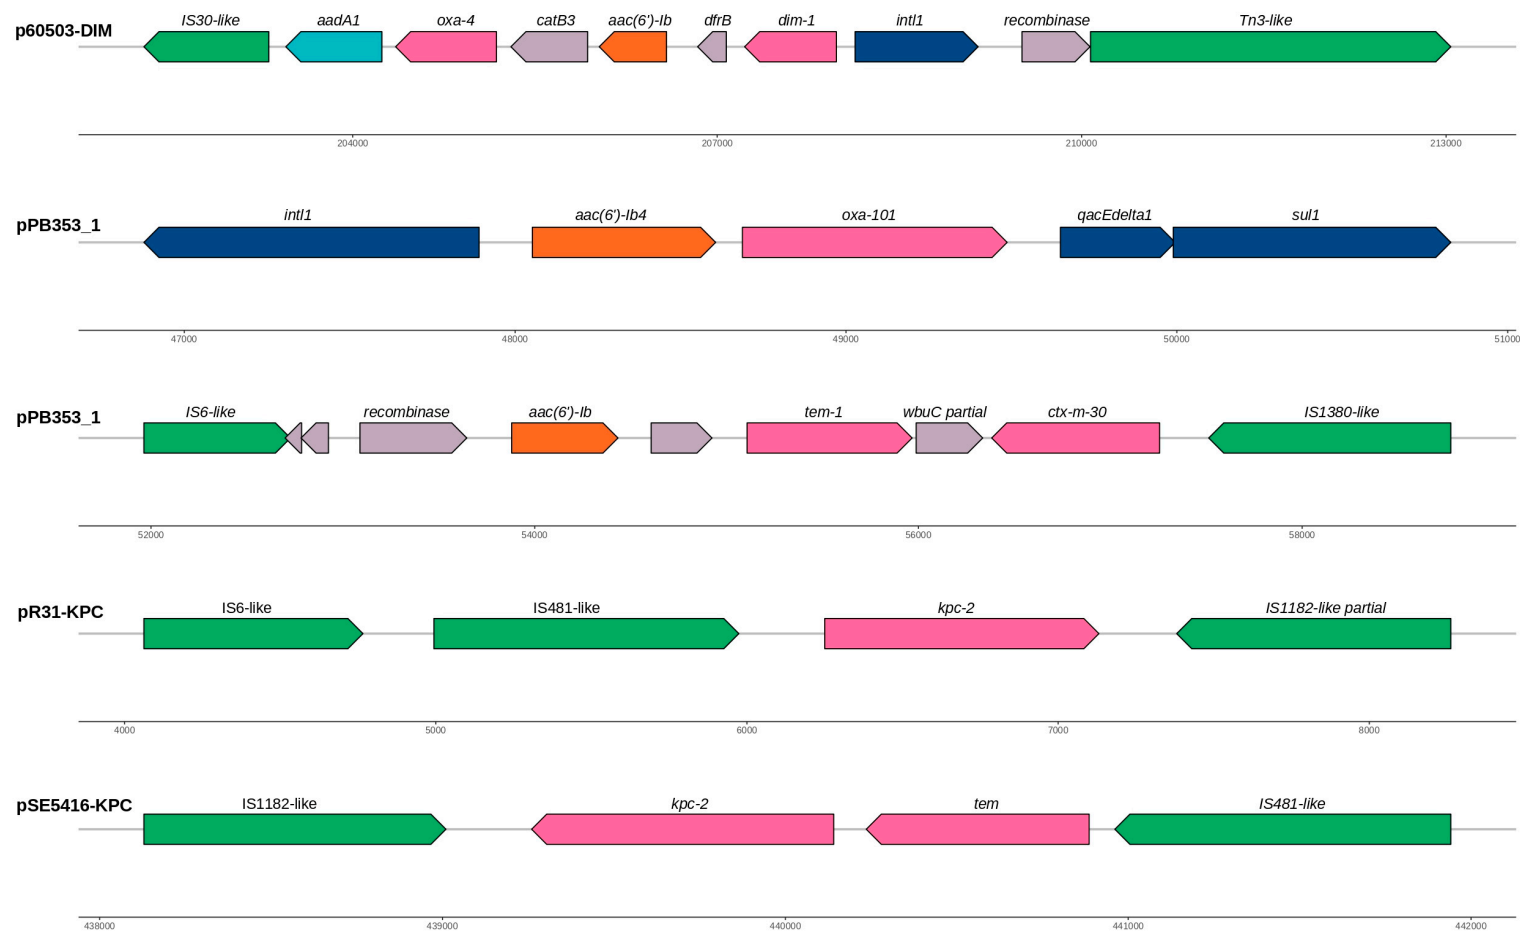

**Figure S7.** Mobile Genetic Elements carrying beta-lactams resistance genes found in plasmids. Blue arrows represent integron genes and green arrows represent insertion sequences. Pink arrows are the beta-lactamases and acetylases genes are represented with orange arrows. Other genes are in color gray.

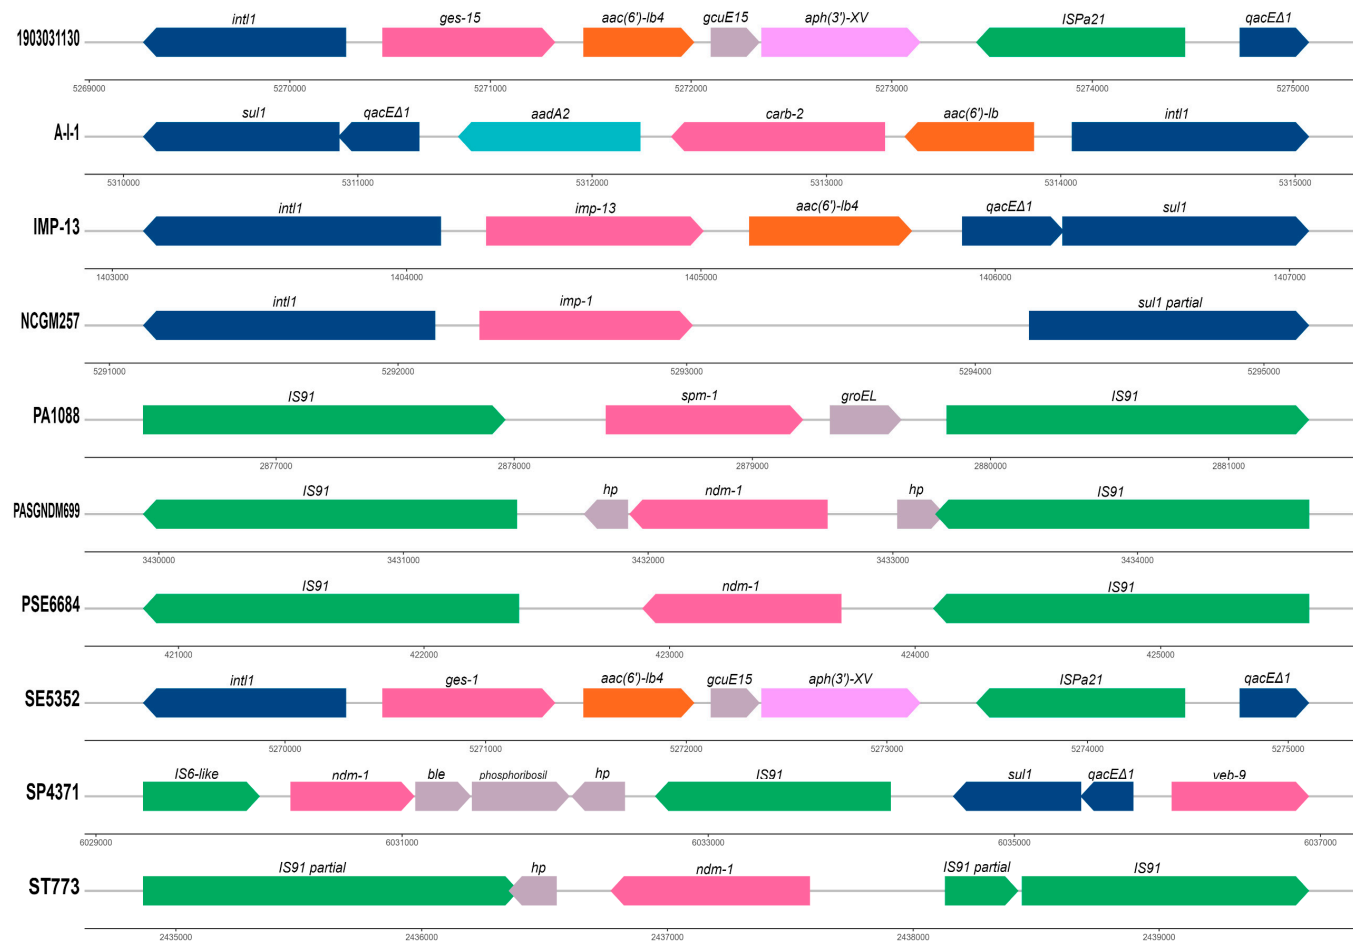

**Figure S8.** Mobile Genetic Elements carrying beta-lactams resistance genes found in Integrative Conjugative Elements with type 4 secretion system complete. Blue arrows represent integron genes and green arrows represent insertion sequences. Pink, yellow, orange, and dark pink arrows represent the beta-lactamases, phosphotransferases, acetylases and adenylases genes. Other genes are in color gray. This is a representative figure of some MGEs found in the genomes included in this study.

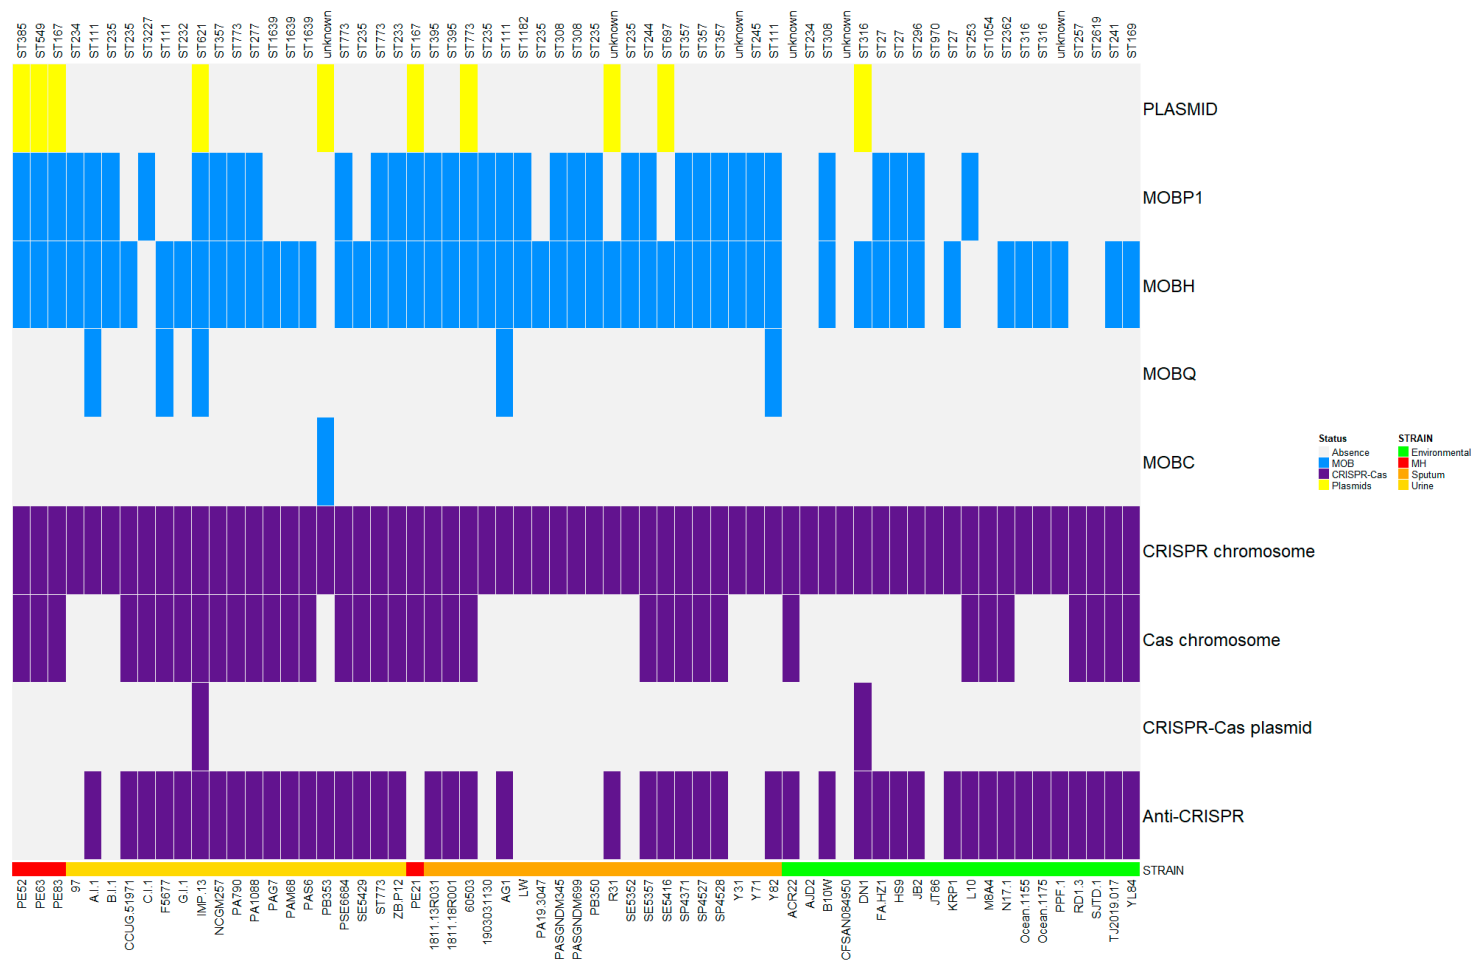

**Figure S9.** Presence and absence of MOB relaxases, chromosomal CRISPR-Cas systems, plasmid CRISPR-Cas systems, and anti-CRISPR systems. The heatmap represents in yellow the presence of plasmids, in blue the presence of MOB relaxases and purple the presence of the different CRISPR-Cas and ANTI-CRISPR systems. \*MH means Mexican Hospital.
